# Supplementary material
Source: Springer Nature journal article supplement (https://www.springermedizin.de/resource/supplementary/12891_2014_2231_MOESM8_ESM.pdf/9509734)

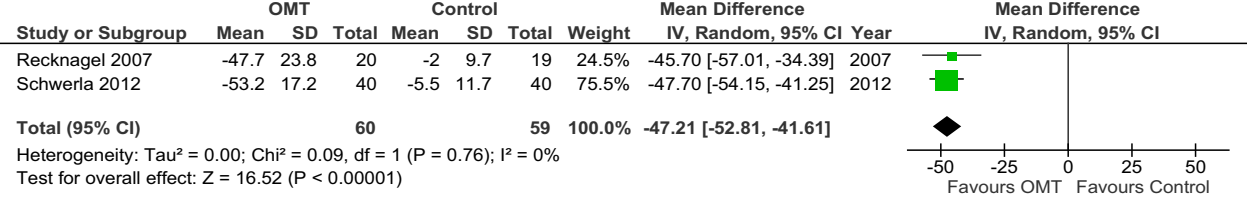

Supplement: MOESM8 [file 9509734]
